# Supplementary material
Source: PubMed Central journal article supplement (PMC6777586)
Supplement: CJN.03240319SupplementaryData.pdf [file CJN.03240319SupplementaryData.pdf]

*Supplemental material is neither peer-reviewed nor thoroughly edited by CJASN. The authors alone are responsible for the accuracy and presentation of the material.*

## **Supplemental Material Table of Contents**

Supplemental Table 1. Description of the Kidney Replacement Therapy modality used

Supplemental Table 2. Circuit characteristics by treatment modality

*Supplemental material is neither peer-reviewed nor thoroughly edited by CJASN. The authors alone are responsible for the accuracy and presentation of the material.*

Supplemental Table 1. Description of the Kidney Replacement Therapy modality used

|            | SCUF                                           | PIRRT                            | CVVH                                                 |
|------------|------------------------------------------------|----------------------------------|------------------------------------------------------|
| Centers    | All                                            | CCHMC                            | COA, SCH                                             |
| Dose       | NA                                             | 2000 mL/1.73m <sup>2</sup> /hour | 2000 mL/1.73m <sup>2</sup> /hour<br>or 24 mL/kg/hour |
| Duration   | Continuous or<br>Intermittent for 6-8<br>hours | 6-8 hours                        | Continuous                                           |
| Blood Flow | 30-40 mL/min                                   | 30-40 mL/min                     | 30-40 mL/min                                         |

SCUF, Slow Continuous Ultrafiltration; PIRRT, Prolonged Intermittent Renal Replacement Therapy; CVVH, Continuous VenoVenous Hemofiltration; CCHMC, Cincinnati Children’s Hospital Medical Center; COA, Children’s of Alabama; SCH, Seattle Children’s Hospital

Supplemental material is neither peer-reviewed nor thoroughly edited by CJASN. The authors alone are responsible for the accuracy and presentation of the material.

Supplemental Table 2. Circuit characteristics by treatment modality

|                                                                                                                                                                                                                                                  | SCUF<br>N=157                          | PIRRT<br>N=190                         | CVVH<br>N=537                           |
|--------------------------------------------------------------------------------------------------------------------------------------------------------------------------------------------------------------------------------------------------|----------------------------------------|----------------------------------------|-----------------------------------------|
| Blood flow rate (mL/minute)                                                                                                                                                                                                                      | 40 (40, 40)                            | 40 (40, 40)                            | 35 (30, 40)                             |
| Cardiorespiratory support at initiation (or with complications at initiation)                                                                                                                                                                    | 1 (2)                                  | 7 (4)                                  | 20 (4)                                  |
| Type of support needed* <ul style="list-style-type: none"> <li>• Normal saline</li> <li>• Inotrope</li> <li>• Calcium Chloride</li> <li>• Albumin</li> <li>• Sodium bicarbonate</li> <li>• Blood Transfusion</li> </ul>                          | 1                                      | 0<br>5<br><br>4                        | 5<br>3<br>3<br>8<br>2<br>1              |
| Circuits with complications during therapy                                                                                                                                                                                                       | 31 (20)                                | 32 (17)                                | 70 (13)                                 |
| Type of complication* <ul style="list-style-type: none"> <li>• Hypothermia</li> <li>• Bleeding</li> <li>• Hypotension</li> <li>• Clot</li> <li>• Thrombocytopenia</li> <li>• Seizure</li> <li>• Catheter malfunction</li> <li>• Other</li> </ul> | 1<br>0<br>10<br>12<br>2<br>2<br>4<br>1 | 2<br>1<br>14<br>11<br>-<br>-<br>4<br>8 | 1<br>16<br>13<br>29<br>-<br>-<br>4<br>2 |
| Anticoagulation <ul style="list-style-type: none"> <li>• Heparin</li> </ul>                                                                                                                                                                      |                                        |                                        |                                         |

Supplemental material is neither peer-reviewed nor thoroughly edited by CJASN. The authors alone are responsible for the accuracy and presentation of the material.

|                                                                                                                            |              |              |                   |
|----------------------------------------------------------------------------------------------------------------------------|--------------|--------------|-------------------|
| <ul style="list-style-type: none"> <li>• Citrate</li> <li>• Argatroban</li> <li>• None</li> <li>• Unknown/Other</li> </ul> | 93           | 140          | 498               |
|                                                                                                                            | -            | 2            | -                 |
|                                                                                                                            | 10           | -            | 4                 |
|                                                                                                                            | 45           | 47           | 34                |
|                                                                                                                            | 9            | 1            | 1                 |
| Circuit life (hours)                                                                                                       | 4.5 (3.5, 6) | 7 (6, 8)     | 66.4 (30.1, 71.7) |
| Circuit survival to 60 hours for continuous**                                                                              | NA           | NA           | 309/456 (68)      |
| Circuit survival to 6 hours for intermittent                                                                               | NA           | 168/180 (93) | NA                |

Continuous variables are shown as median (Interquartile range) and categorical data as number (%)

\* Some patients needed more than 1 intervention or had multiple complications

\*\* After censoring circuits that were changed due to patient issues or scheduling concerns

SCUF, Slow Continuous Ultrafiltration; PIRRT, Prolonged Intermittent Renal Replacement Therapy; CVVH, Continuous VenoVenous Hemofiltration
